# Supplementary material
Source: PubMed Central journal article supplement (PMC3932147)
Supplement: NIHMS513620-supplement-1_si_001.pdf [file NIHMS513620-supplement-1_si_001.pdf]

## SUPPLEMENTAL INFORMATION

### **SCHEMA computational design of virus capsid chimeras: calibrating how genome packaging, protection, and transduction correlate with calculated structural disruption**

Michelle L. Ho<sup>1</sup>, Benjamin A. Adler<sup>1,2</sup>, Michael L. Torre<sup>1</sup>, Jonathan J. Silberg<sup>1,2\*</sup>, and Junghae Suh<sup>1\*</sup>

<sup>1</sup>Department of Bioengineering, Rice University, Houston, TX 77005

<sup>2</sup>Department of Biochemistry and Cell Biology, Rice University, Houston, TX 77005

\*Corresponding authors: [joff@rice.edu](mailto:joff@rice.edu) and [jsuh@rice.edu](mailto:jsuh@rice.edu)

MLH: [michelle.liane.ho@gmail.com](mailto:michelle.liane.ho@gmail.com)

BAA: [badler91@gmail.com](mailto:badler91@gmail.com)

MLT: [mltorre3@gmail.com](mailto:mltorre3@gmail.com)

```

AAV2      MAADGYLPDWLEDTLSEGIQWVKLKPGRPPPKPAERHKDDSRGLVLPGYKYLGPFGNGLD 60
AAV4      MTDGYLPDWLEDNLSEGVREWWALQPGAPKPKANQQHQDNARGLVLPGYKYLGPFGNGLD 59
          :*****.****:*:* *:*.* ** . :*:*:***** *****

AAV2      KGEPVNEADAAALEHDKAYDRQLDSGDNPYLKYNHADAFAERLQKEDTSFGGNLGRAVFQ 120
AAV4      KGEPVNAADAAALEHDKAYDQQLKAGDNPYLKYNHADAFAERLQKEDTSFGGNLGRAVFQ 119
          ***** *****:*. :*****:*. : *****

AAV2      AKKRVLLEPLGLVEEPVKIAPGKKRPVEHSPVEPDSSSGTGKAGQQPARKRLNFGQTGDAD 180
AAV4      AKKRVLLEPLGLVEQAGETAPGKKRPLIESPQQDSSTGIGKKGKQPAKKKLVFEDETGAG 179
          *****: . :*****: .** :****:* ** *:**:** * : .*.

AAV2      SVPDPQPLGQPPAAPSGLGTNTMATGSGAPMADNNEGADGVGNSSGNWHCDSTWGMGRVI 240
AAV4      DGP---PEGSTSGAMS--DDSEMRAAAGGAAVEGGQADGVGNASGDWHCDSTWSEGHVT 234
          . * * *...* * . . * :*:.. .:*.*****:*:***** .:*

AAV2      TTSTRTWALPTYNNHLYKQISSQSGASNDNHYFGYSTPWGYDFNRFHCHFSPRDWQRLI 300
AAV4      TTSTRTWLPTYNNHLYKRLG---ESLQSNITYNGFSTPWGYDFNRFHCHFSPRDWQRLI 291
          *****.*****:.. : :.* * :*****

AAV2      NNNWGFPRKRLNFKLFNIQVKEVTQNDGTTTIANNLTSTVQVFTDSEYQLPYVLGSAHQG 360
AAV4      NNNWGMRPKAMRVKIFNIQVKEVTSNGETTANNLTSTVQIFADSSYELPYVMDAQEG 351
          *****:*** :..*:***** .:* **:*****:*.**.*:***:..:.*

AAV2      CLPPFPADVFMVPOQYGYLTLNNG---SQAVGRSSFYCLEYFPSQMLRTGNNFTFSYTFED 417
AAV4      SLPPFPNDVFMVPOQYGYCLVTGNTSQOQOTDRNAFYCLEYFPSQMLRTGNNFEITYSFEK 411
          .***** ***** * . * . * ..*:***** :*:**.*

AAV2      VPFHSSYAHSQSLDRLMNPLIDQYLYLSRTNTPSGTTT-QSRLQFSQAGASDIRDQSRN 476
AAV4      VPFHSMYAHSQSLDRLMNPLIDQYWLGLQSTTTGTLNAGTATTNFKLRPTNFSNFKKN 471
          ***** *****: * . * * : . : : :*: : . : : . : *

AAV2      WLPGPCYRQQRVSKTSADNNNSEYSWTG-----ATKYHLNGRDSLVPNGPAMASHKDDEE 531
AAV4      WLPGPSIKQQGFSKTANQNYKIPATGSDSLIKYETHSTLDGRWSALTPGPPMATAGPADS 531
          ***** . :** .** : * : : . * : *:* * :*.**.* : .

AAV2      KFFPQSGVLIFGKQSEKTNVDIEKVMITDEEIRTTPVATEQYGSVSTNLQRGNRQAA 591
AAV4      KFS-NSQLIFAGPKQNGTATVPGLIFTSEEELAAATNATDTDMWGNLPGGDQSNLPT 590
          ** :* :*: * : . :* . .:*.*****: *.. * :*. . . * . . .

AAV2      TADVNTQGVLPGMVWQDRDVLQGPWAKIPHTDGHFHPSPMLGGFGLKHPPPQILIKNT 651
AAV4      VDRLTALGAVPGMVWQNRDIYYQGPWAKIPHTDGHFHPSPLIIGGFGLKHPPPQIFIKNT 650
          . :. : *. :*****:*** * *****:*****:*****:*****

AAV2      PVPANPSTTFSAAKFASFITQYSTGQVSVEIEWELQKENSKRWNPEIQYTSNYNKSVD 711
AAV4      PVPANPATTFSSTPVNSFITQYSTGQVSVQIDWEIQKERSKRWNPEVQFTSNYQQNSLL 710
          *****:***: . *****:*.**:***.******:*.***:.. .

AAV2      FTVDTNGVYSEPRPIGTRYLTRNL 735
AAV4      WAPDAAGKYTEPRAIGTRYLTHHL 734
          : : * : * *:**.*****:.*

```

**Figure S1. Sequence alignment of the AAV capsid proteins recombined.** The alignment of VP subunits from AAV2 and AAV4 was generated using BLAST. Numbering for each residue is based on each VP1. The highlighting of the first residues of VP1 (yellow), VP2 (green), and VP3 (cyan) shows how the majority of the VP primary sequences are identical within these proteins. The bold residues represent those considered by SCHEMA because they represent the portion of the AAV4 VP sequence for which structural coordinates are available.

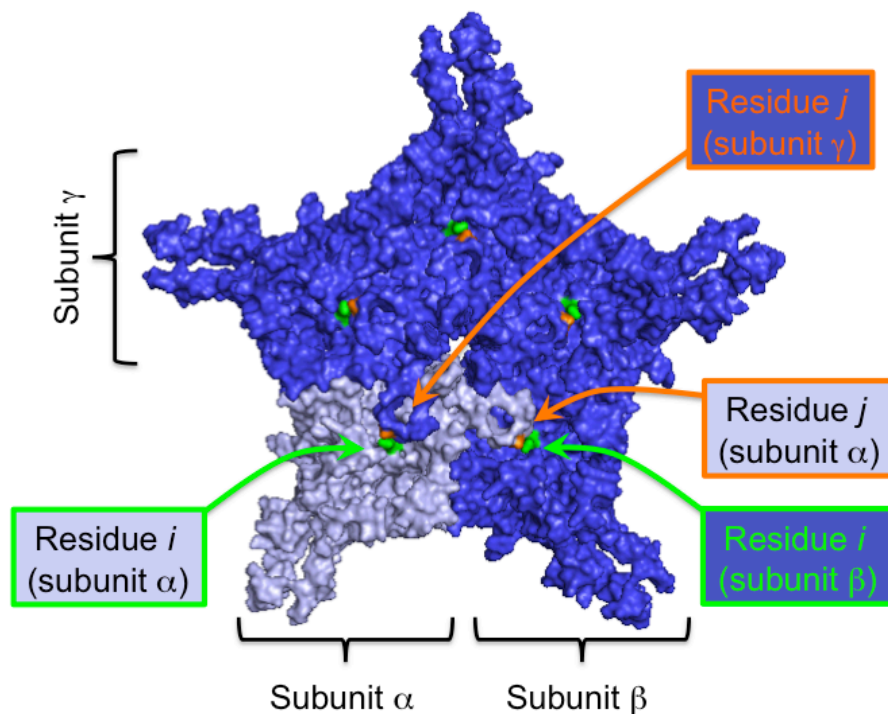

**Figure S2. Scaling intermolecular contacts from subunits to capsids.** A residue-residue contact made by VP residues  $i$  and  $j$  are shown for five subunits at a 5-fold axis of symmetry within the capsid structure, including subunits  $\alpha$ ,  $\beta$ , and  $\gamma$ . When counting the number of  $ij$  residue-residue contacts broken by recombination that are intermolecular on a per subunit basis, two contacts are counted, including the contact made between residue  $i$  within the  $\alpha$  subunit and residue  $j$  within the  $\beta$  subunit and the contact made between residue  $j$  within the  $\alpha$  subunit and residue  $i$  with the  $\gamma$  subunit. For this reason, total disruption per subunit ( $E_{subunit}$ ) was calculated as the sum of  $E_{intra}$  and  $0.5 \times E_{inter}$ .

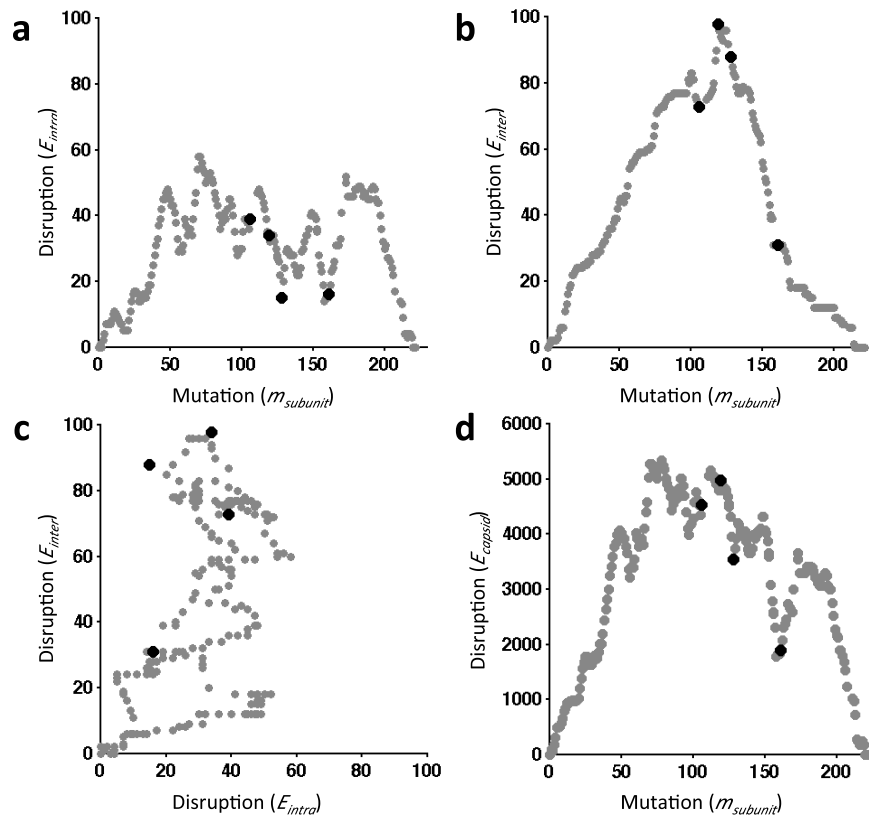

**Figure S3.  $E_{intra}$  and  $E_{inter}$  for single-crossover chimeras.** (a) Intramolecular and (b) intermolecular disruption are plotted versus amino acid substitution level for each possible single-crossover chimera (gray circles) as well as each chimera generated and characterized (black circles). (c) The relative contributions that  $E_{intra}$  and  $E_{inter}$  make to disruption in each chimeric subunit varies. (d) The per subunit disruption is shown for each possible single-crossover chimera.

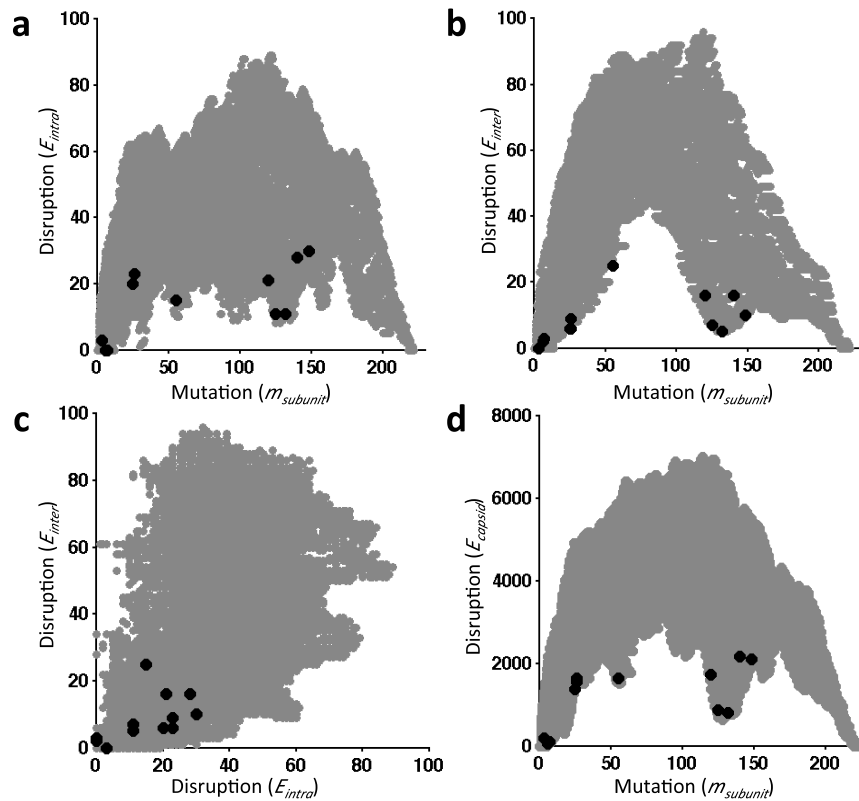

**Figure S4.**  $E_{intra}$  and  $E_{inter}$  for double-crossover chimeras. (a) Intramolecular and (b) intermolecular disruption are plotted versus amino acid substitution level for each possible double-crossover chimera (gray circles) as well as each chimera generated and characterized (black circles). (c) The relative contributions that  $E_{intra}$  and  $E_{inter}$  make to disruption in each chimeric subunit varies. (d) The per subunit disruption is shown for each possible double-crossover chimera.

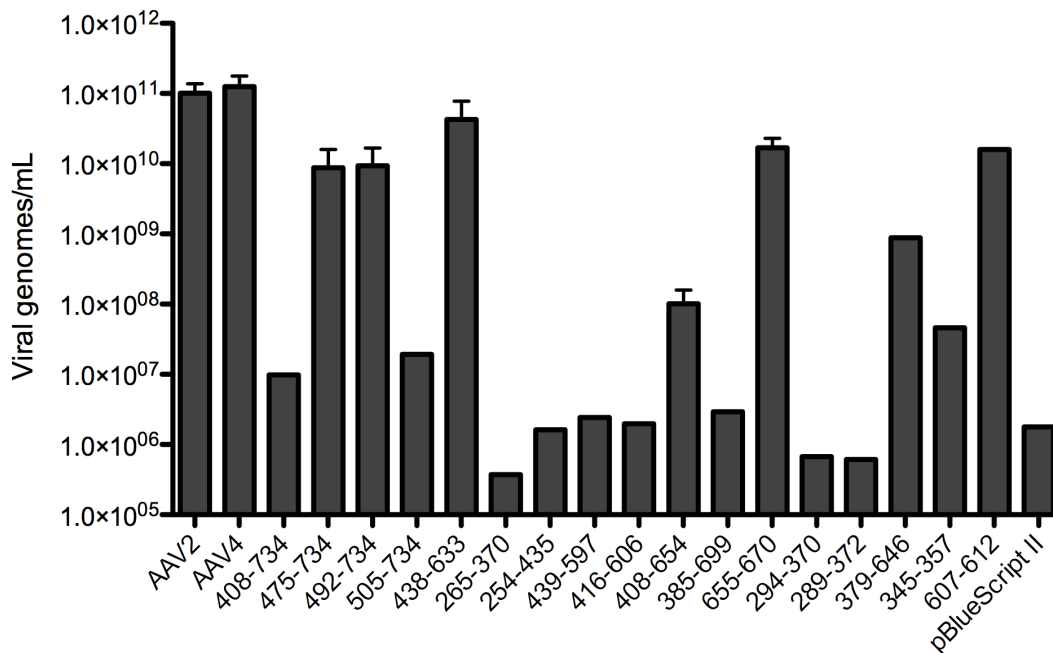

**Figure S5. Genomic titers of chimeras.** Q-PCR was used to measure viral genomic titers of AAV2, AAV4, and chimeric viruses extracted from the 40% iodixanol layer upon centrifugation. pBlueScriptII served as a negative control to determine the background threshold (black dotted line) for detectable genomic titers. **Genomic titers that were within 1-log fold of our negative control titer (pBlueScriptII) were considered not detectable above background, i.e., those below  $2 \times 10^7$ .** Error bars represent the SEM calculated from duplicate sample measurements from one to six independent experiments.

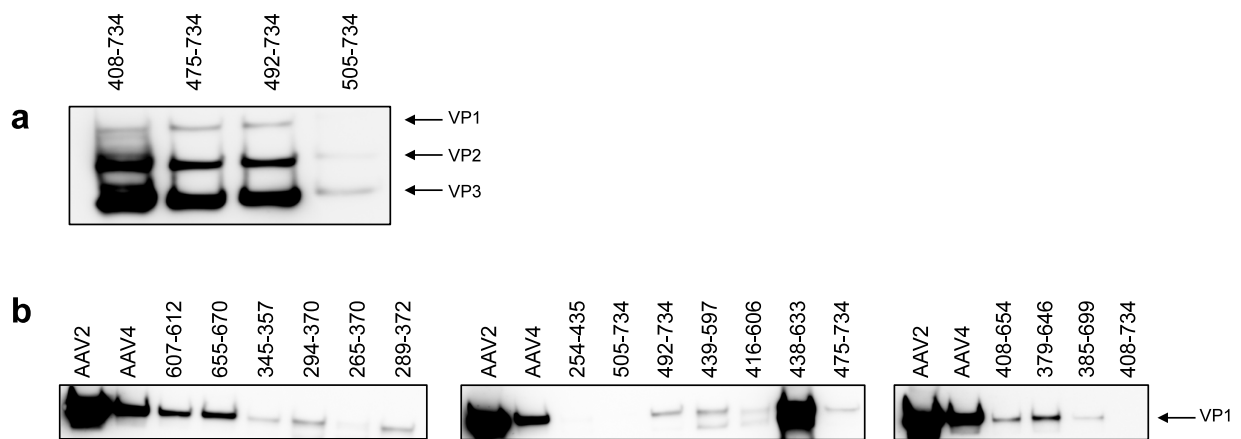

**Figure S6. Immunoblot analysis of chimeric VP expression.** Western blot analysis of chimeric capsids extracted from the 25-40% iodixanol interface after separation using an iodixanol gradient. Viral proteins were detected with **(a)** monoclonal anti-VP (B1) antibody that only binds to the C-termini of VP1, VP2, and VP3 from AAV2 and **(b)** monoclonal anti-VP1 (A1) antibody that binds to both AAV2 and AAV4 VP1. The B1 antibody staining is stronger primarily due to recognition of VP3, which is expressed at higher stoichiometric ratios than VP1 and VP2. This antibody was limited to analyzing the four chimeras with AAV2 C-termini in their VPs. For this reason, the A1 antibody was used to measure expression of all VP1 chimeras.

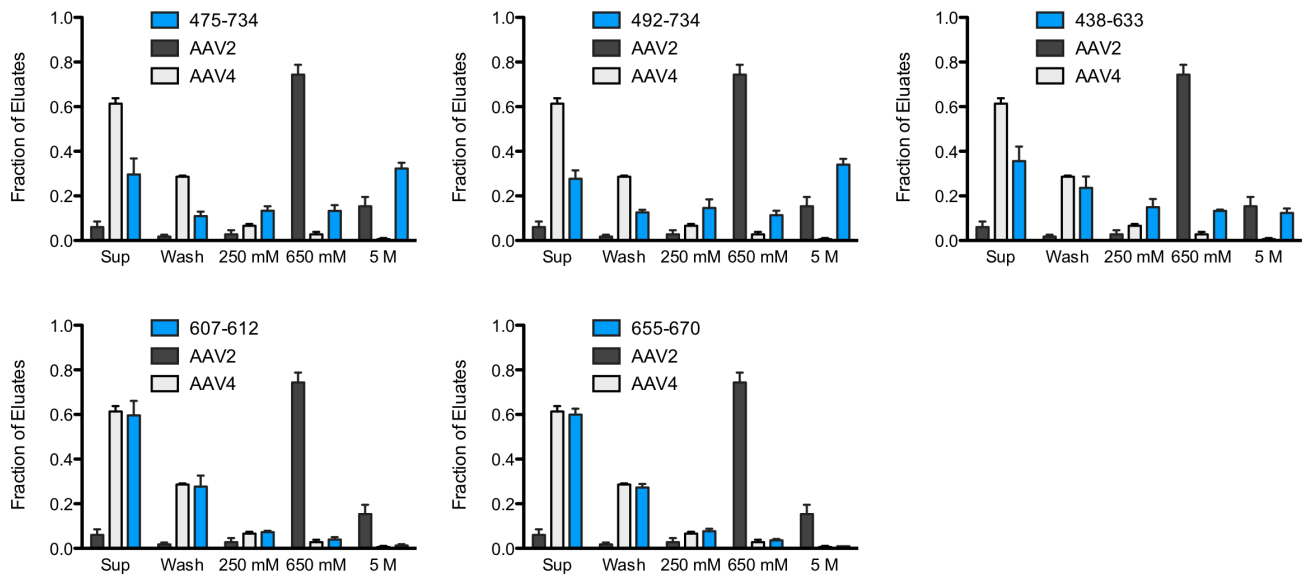

**Figure S7. Binding of chimeric capsids to heparin.** Heparin affinity chromatography was performed for five chimeras (*blue*), AAV2 (*gray*), and AAV4 (*white*). Q-PCR was used to quantify the number of viruses that did not bind to the column, eluted when the column was washed with buffer, and eluted when the column was washed with buffer containing 250 mM, 650 mM, and 5 M NaCl. Each elution is reported as a fraction of total viruses detected in the five eluates: supernatant (Sup), wash (Wash), low salt wash (250 mM), intermediate salt wash (650 mM), and high salt wash (5 M). Error bars indicate the SEM calculated from three independent experiments.



tcgcgcttccggtgatgacgggtgaaaacctctgacacatgcagctcccggagacgggtcacagcttctgtgtaagcggatgcccggagcagacaagcccgtcag  
ggcgcgtaagcgggtgtggcgggtgctggccttaactatgcccgcacagagcagattgtactgagagtgaccatatacgggtgtgaaataccgcacaga  
tgcgtaaggagaaaaataccgcacaggaattgtaaacgttaataattgttaaaattcgcggttaaaattttgttaaatcagctcatttttaaccaataggccg  
aaatcggcaaaaatcccttataaatcaaaagaatagaccgagatagggttgagtggttccagtttgacaagaagtcactatataaagaacctggactccaacg  
tcaaagggcgaaaaaccgtctatcaggggcagtgcccactacgtgaaccatcacctaatcaagtttttggggcagagtgccgtaaaagcataaaatcggaacc  
ctaaagggagccccgatttagagcttgacggggaaaagccggcgaacgtggcgaggaaggaaggaagcgaagggagcgggctaggcgcgtggcaagt  
gtagcgggtcacctgcccgaaccaccaccccggcgttaatgcccgcctacagggcgcgtcgcgccattcgccattcaggtgcccgaactgttgggaaggg  
cgatcgtgcccggcctcttcgctattacgccagcggcgaagggggatgtgctgcaagggcgttaagttgggtaacgccagggtttccagtcacgacggtt  
aaaacgacggccagtgaaattgtaatacagctcactataggggcaattcgagctcgggtcccctagagtcctgtattagaggtcacgtgaggttttgcgacatt  
tgcgacaccatgtggctacgctgggtatttaagcccagtgacacgcagggcttccattttgaaagcgggaggtttgaaaccgagcccatgcccgggtttta  
cgagattgtgattaaggtccccagcgaccttgacgggcatctgcccgcatttctgacagcttctgtaactgggtggccgagaaggaatgggagttgccccaa  
ttctgacatggtctgaaatctgattgagcaggcaccctgacgtggccgagaaagctgcagcgcgacttctgacggaatggcggcgtgtgagtaagccccgg  
agcccttttcttgtgcaattgagaagggagagagctacttccacatgcacgtgctcgtggaaccaccgggggtaaaatccatggttttgggacgtttcctga  
ctcaagattcgcgaaaaaactcagagaatttaccggggatcggcggacttgcctggaactggctgggttcgcgggtcacaaagaccgaaatggcggcggagggga  
acaaggtgggtgagtgctacatcccccaattacttctccccaaaaccagcctgagctccagtgccgtggactaatatggaacagttttaaagcgcctgtt  
tgaatctcacggagcgaacgggttggcggcagcactctgacgcagctgtcgcagacgcaggagcagaacaagagaatcagaatccaatctgacgcccgg  
gtacagatcaaaaactcagcaggtacaggtggtcgggtggctggcaggggattacctcggagaagcagtggtgacccagggaccagcctca  
tacctctctcaatgcccctccaactcggcgtcccaaatcaaggtccttggacaactcgggaaagattatgagcctgactaaaaaccgccccgactacctg  
gtggccagcagcccgtggaggacatttccagcatcggatttataaaattttggaaactaaacgggtacagatccccaatatgcccgttccgcttcttctgggatgg  
gcccagaaaaagtccgcaagaggaacaccatctggctgttgggctgcaactacgggaagaccaatcgcggaggccatagcccacactgtgcccttctac  
gggtgcgtaaaactggaccaatgagaactttcccttcaacgactgtgtcgcacaagatgggtgatctggtaggaggggaaagtgaccgccaaaggtcgtggagt  
ggccaaagccattctcggaggaagcaaggtgcccgtggaccagaaatgcaagtcctcggccagatagaccgactcccgtgatcgtcacctccaacaccaaca  
tgtcgcctgtgatgacgggaactcaacgacctctgaacaccagcagccgttgaagaccggatgttcaaatgaaactcaccggcctctggtatcagctt  
gggaaggtcacaagcaggaagtcaaaagacttttccgggtggcaaaaggatcacgtggttgaggtggagcatgaattctacgtcaaaaaggggtggagccaagaa  
aagaccgccccccagtgacgcagatataaagtgaagcccaaacgggtgcccggagtcagttgcccagccatcagctcagcgcggaagctcgggtggactacgcgg  
acaggtaccaaaaacaaatgttctcgtcacgtgggtatgaatctgatgcttttccctgccggcaatgagagagaatgaatcagaatgtggacatttcttccg  
cacggggtcatggactgtcccagtgcttcccctgtcagaatctcaaccctgtctgtcgcagaaagcggacgtatcagaactgttccgattcattcact  
catggggagggcggcggaggtggcctgctcggcctgcgaactggcaatgtggacttggatgactgtgacatggaacaataaatgactcaaacccagatgact  
gacgggttacccttcagattggctagaggacaacctctctgaaaggcgttcgagagtggtggggcctgcaacctggagccctaaaccgaagcaaatcaacaaca  
tcaggacaacgctcggggtcttctgcttccgggttacaataacctcggaccggcaaccggactcgcacaagggggaaccggctcaacgcagcggacgccc  
tcgagcagcacaagggcctacgaccagcagctcaagggcgggtgacaaccctcaactcaagtaacaaccgcggcagcggaggtccagcagcggcttcagggcgac  
ACTAGTaaaaATGCATAaaaGCTAGCcctgttaatacaataaacgggttattctgcttccagttgacttgggtgctcgcggcggcctcgaataagcttttctccct  
tagtgagggttaattccgagctggcgtaatcatggctatagctgttctcctgtgtgaaattggtatccgctcaaatccacaacaacatcagcccgaagcata  
aagtgtaaagcctggggtgcctaatgagtgagcctaactacattattgogttgogctcactgcccgttccagtcgggaaacctgctgcccagctgcattaa  
tgaatcggccaacgcgcccgggagggcgggttgcgctattggcgccttccgctcctcgtcactgctcgtcgcgctcggctcgttccgctcggcgcagcggta  
tcagctcactcaagggcgttaacaggttatccacagaatcaggggataacgcaggaagaacatgtgagcaaaagggcagcaaaagggcggaccgtaaaaaa  
gcccgcgttgcggcgttttccataggtcggccccctgacgagcacaacaaatcgagcctcaagtcagaggtggcgaacccgacaggtataaagata  
ccagggcttcccctggaagctccctcgtgctcctcgttccgacccctgcccgttaccggatactgtccgcttctcctcctcgggaagcgtggcgttct  
taatagctcacgctgtaggtatctcagttcgggtaggtcgttccgctcgaagctgggctgtgtgcacgaacccccctcagcccagcctgccccttatccgg  
taactatcgtcttgagtcacaaccggtaagacacgacttatcgccactggcagcaccactgtaaacaggattagcagagcaggtatgagcgggtgctacaga  
gttcttgaagtggtggcctaactacggctacactagaaggacagatttgggtatctgcgctcgtgtaagccagttacttcggaaaaagagttggtagctcttg  
atccggcaaaacaaccaccgctggtagcgggtggttttttggtttgcaagcagcagattacgcgcagaaaaaaggatctcaagaagatcctttgatcttttac  
ggggtctgacgctcagtggaacgaaaactcacgttaaggattttgggtcatgagattatcaaaaaggatcttccactagatccttttaaatataaaatgaagtt  
ttaaatcaatcaaaagataaatgagtaaaacttggctgacagttaccaatgcttaacagtgaggcaccctatctcagcagatctgctatttctgcttccatag  
ttgctgactccccctcgtgtagataactacgatacgggaggggttaccatctggcccagtgctgcaatgataccgcgagaccacgctcaccggctccagatt  
tatcagcaataaaccagccagccggaagggcgcagcagaagtggtcctgcaactttatccgctcattccagctctataatgttgcggggaagctagagtaa  
gtagttcggcagttaatagtttgcgcaacggttggccattgctacagcagcagctggtgctcagctcgtcttgggtatggcttcatcgcctcgggttcccaac  
gatcaagggcagttacatgatccccatggttgcaaaaaagcgggttagctcctcggctcctccgatcgttgcagaagtaagttggccgaggttatcactc  
atgggtatgcagcactgcataatctcttactgctatgccatccgtaagatgcttttctgtgactggtgagtaactcaaccaagtcattctgagaatagtgatg  
cggcgcagcaggttgccttgcggcggcgtcaaacgggataaatccgcgccacatagcagaactttaaagtgctcatcttggaaaacgcttctcggggcgaaaa  
ctctcaaggatcttaccgctgttgagatccagttcgaatgaaccactcgtgcaccaactgatctcagcatcttttactttcaccagcgttctcgggtgagca  
aaaaaggaagcaaaatgcccgaaaaaaggaataaagggcgcagcggaaatgttgaatactatacttcttccctttcaaatatttgaagcatttatcaggggt  
tattgtctcatgagcggatacatatttgaatgtatttagaaaaataacaaatagggggttccgcgcacatttccccgaaagtgccacctgacgtctaaagacc  
attattatcatgacattaacctataaaaataggcgtatcacgagggccttctgct

**Figure S8. pXR4-nocap plasmid sequence.** The *cap* gene fragment that is constant in all chimeras is highlighted in yellow, and the restriction sites used for subcloning all assembled chimeric genes are red and underlined.

|      |                                                                        |     |
|------|------------------------------------------------------------------------|-----|
| AAV2 | MAADGYLPDWLEDTLSEGIQWVKLPGPPPKPAERHKDDSRGLVLPGYKYLPGFNGLD              | 60  |
| AAV4 | <b>MTDGYLPDWLEDNLSEGVREWWALQPGAPKPKANQQHQDNARGLVLPGYKYLPGFNGLD</b>     | 59  |
|      | :*****.*:**:*:**.* ** . :*:*:***** **                                  |     |
| AAV2 | KGEPVNEADAAALEHDKAYDRQLDSGDNPYLKYNHADAEFQERLKEDTSFGGNLGRAVFQ           | 120 |
| AAV4 | <b>KGEPVNAADAAALEHDKAYDQQLKAGDNPYLKYNHADAEFQQRLQGDTSFGGNLGRAVFQ</b>    | 119 |
|      | ***** **:**:*:**:*:**:*:**:*:**:*:**:*:**:*:**:*:**:*:**:*:**          |     |
| AAV2 | AKKRVEPLGLVEEVPKTA PGKKRVEHSFVEPDSSSGTGKAGQPARKRLNFGQTGDAD             | 180 |
| AAV4 | <b>AKKRVEPLGLVEQAGETAPGKKRPLIESPQQPDSSTGIGKKGKQPAKKLVFEDETGA</b>       | 179 |
|      | *****:**:*:**:*:**:*:**:*:**:*:**:*:**:*:**:*:**:*:**:*:**             |     |
| AAV2 | SVDPDQPLGQPPAAPSPGLTNTMTATGSGAPMADNNEGADGVGNSSGNWHCDSTWMDRVI           | 240 |
| AAV4 | <b>DGP---PEGSTSGAMS--DSEMRAAAGGAAVEGGQADGVGNASGDWHCDSTWSEGHVT</b>      | 234 |
|      | . * * * . . . * * . . * :*:*. . . :*:*****:**:*:**:*:**                |     |
| AAV2 | TTSTRTWALPTYNNHLYKQISSQSGASNDNHYFGYSTPWGYFDNRFHCHFSRDPWQRLI            | 300 |
| AAV4 | <b>TTSTRTWLPTYNNHLYKRLG---ESLQSN TYNGFSTPWGYFDNRFHCHFSRDPWQRLI</b>     | 291 |
|      | *****.*:**:*:**:*:**:*:**:*:**:*:**:*:**:*:**:*:**:*:**:*:**           |     |
| AAV2 | NNNWGFRPKRLNFKLFNIQVKEVTQNDGTTTIANNLTSTVQVFTDSEYQLPYVLGSAHQG           | 360 |
| AAV4 | <b>NNNWGMRPKAMRVKIFNIQVKEVTTNGETTVANNLTSTVQIFADSSYELPYVMDAQOEG</b>     | 351 |
|      | *****:**:*:**:*:**:*:**:*:**:*:**:*:**:*:**:*:**:*:**:*:**             |     |
| AAV2 | CLPPFPADVFMVPPQYGYLTLNNG---SQAVGRSSFYCLEYFPSQMLRTGNNFTFSYTFED          | 417 |
| AAV4 | <b>SLPPFPNDVFMVPPQYGYCGLVGTGNTSQOQTDRNAFYCLEYFPSQMLRTGNNFEITYSFEK</b>  | 411 |
|      | .***** **:**:*:**:*:**:*:**:*:**:*:**:*:**:*:**:*:**:*:**:             |     |
| AAV2 | VPFHSSYAHSQSLDRLMNLIDQYLYLSRTNTPSGTTT-QSRLQFSQAGASDIRDQSRN             | 476 |
| AAV4 | <b>VPFHSMYAHSQSLDRLMNLIDQYLWGLQSTTTGTTLNAGTATTNFTKLRPTNFSNFKKN</b>     | 471 |
|      | ***** **:**:*:**:*:**:*:**:*:**:*:**:*:**:*:**:*:**:*:**:              |     |
| AAV2 | WLPGPCYRQQRVSKTSADNN <b>SEYSWTG-----ATKYHLNGRDSLVPNGPAMASHKDEE</b>     | 531 |
| AAV4 | <b>WLPGPSIKQQGFSKTANQNYK</b> IPATGSDSLIKYETHSTLDGRWSALTPGPPMATAGPADS   | 531 |
|      | *****.*:**:*:**:*:**:*:**:*:**:*:**:*:**:*:**:*:**:*:**:               |     |
| AAV2 | <b>KFFPQSGVLIFGKQSEKTNVDIEKVMITDEEEIRTTNPVATEQYGSVSTNLQRGNRQAA</b>     | 591 |
| AAV4 | KFS-NSQLIFAGPKQNGNTATVPGTLI FTSEELAAATNATD TDMWGNLPGGDQNSNLPT          | 590 |
|      | * * :* :*: * . :* . . :*:**:*:**:*:**:*:**:*:**:*:**:                  |     |
| AAV2 | <b>TADVNTQGVLPGMVWQDRDQVYLQGP I WAKIPHTDGHFHPSPLMGGFGLKHPPPQILIKNT</b> | 651 |
| AAV4 | VDRLTALGAVPGMVWQNRDIYYQGP I WAKIPHTDGHFHPSP LIGGFGLKHPPPQIFIKNT        | 650 |
|      | . :*: * . :*****:**:*:**:*:**:*:**:*:**:*:**:*:**:*:**:                |     |
| AAV2 | <b>PVPANPSTTFSAAKFASFITQYSTGQVSV EIEWELQKENSKRWNPEIQYTSNYKNSVND</b>    | 711 |
| AAV4 | PVPANPATTFSSTPVNSFITQYSTGQVSVQIDWEIQERSKRWNPEVQFTSNYQQNSLL             | 710 |
|      | *****:**:*:**:*:**:*:**:*:**:*:**:*:**:*:**:*:**:*:**:                 |     |
| AAV2 | <b>FTVDTNGVYSEPRPIGTRYLTRNL</b>                                        | 735 |
| AAV4 | WAPDAAGKYTEPRAIGTRYLTHHL                                               | 734 |
|      | :: * : * * :**.*:**:*:**:*:**:                                         |     |

**Figure S9. AAV2-AAV4 chimera nomenclature.** Chimera names are based on the inheritance of AAV2 (red) and AAV4 (blue) sequence and are numbered based on the residues inherited from AAV2. As illustrated in this figure for chimera 492–734, the numbering represents the location in AAV4 that aligns with the AAV2 residues inherited in each chimera. The first AAV2 residue in this representative chimera, 492 by AAV4 VP1 numbering, is highlighted cyan, while the final AAV2 residue, 734 by AAV4 VP1 numbering, is highlighted yellow.

| VP protein | $m_{subunit}$ | $E_{intra}$ | $E_{inter}$ | $E_{subunit}$ | $E_{capsid}$ |
|------------|---------------|-------------|-------------|---------------|--------------|
| AAV4       | 0             | 0           | 0           | 0             | 0            |
| AAV2       | 223           | 0           | 0           | 0             | 0            |
| 607-612    | 3             | 3           | 0           | 3             | 180          |
| 655-670    | 6             | 0           | 2           | 1             | 60           |
| 345-357    | 7             | 0           | 3           | 1.5           | 90           |
| 294-370    | 25            | 20          | 6           | 23            | 1,380        |
| 265-370    | 26            | 24          | 6           | 27.5          | 1,620        |
| 289-372    | 26            | 21          | 9           | 25.5          | 1,530        |
| 254-435    | 55            | 9           | 25          | 21.5          | 1,290        |
| 505-734    | 106           | 29          | 69          | 75.5          | 3,810        |
| 492-734    | 119           | 32          | 96          | 80            | 4,800        |
| 439-597    | 120           | 17          | 16          | 25            | 1,500        |
| 416-606    | 125           | 12          | 7           | 15.5          | 930          |
| 438-633    | 127           | 9           | 5           | 11.5          | 690          |
| 475-734    | 128           | 14          | 86          | 57            | 3,420        |
| 408-654    | 132           | 12          | 5           | 14.5          | 870          |
| 379-646    | 140           | 28          | 16          | 36            | 2,160        |
| 385-699    | 148           | 30          | 10          | 35            | 2,100        |
| 408-734    | 161           | 15          | 31          | 31.5          | 1,830        |

**Table S1. Subunit SCHEMA disruption values used to calculate  $E_{capsid}$ .** The  $E_{intra}$  and  $E_{inter}$  values used to calculate  $E_{subunit}$  and  $E_{capsid}$  are provided for each chimera analyzed in this study. For each chimera, the per subunit amino acid substitution level ( $m_{subunit}$ ) was calculated relative to AAV4 ( $m = 0$ ).

| Sample  | Titer before Amicon<br>(genomes/mL) | Titer after Amicon<br>(genomes/mL) |
|---------|-------------------------------------|------------------------------------|
| AAV2    | $6.12 \times 10^{11}$               | $2.78 \times 10^{12}$              |
| AAV4    | $3.80 \times 10^{11}$               | $1.65 \times 10^{12}$              |
| 438-633 | $5.51 \times 10^{11}$               | $2.26 \times 10^{11}$              |

**Table S2. Genomic titer of viruses prepared for TEM before and after concentration.** AAV2, AAV4, and chimera 438-633 viruses were diluted in 1 x GB containing 0.001% Pluronic F-68 and spun in an Amicon Ultra-4 Centrifugal Filter Unit to simultaneously exchange buffers and concentrate viruses for TEM. Q-PCR was used to measure genomic titers of viruses before and after Amicon concentration to ensure no significant loss of sample occurred and that virus concentrations remained adequate for imaging.

| Virus   | Genomic Titer | VP Subunit Expression | % Nuclease-Protection | % of Heparin-Bound Eluates | % Transduction Efficiency |
|---------|---------------|-----------------------|-----------------------|----------------------------|---------------------------|
| AAV4    | ◆◆◆◆          | Y                     | 109.0 ± 16.4          | 10.4 ± 0.9                 | 52.1 ± 4.8                |
| AAV2    | ◆◆◆◆          | Y                     | 113.8 ± 3.4           | 92.0 ± 1.1                 | 79.4 ± 1.6                |
| 607-612 | ◆◆◆◆          | Y                     | 101.6 ± 5.0           | 12.3 ± 0.7                 | 38.3 ± 2.8                |
| 655-670 | ◆◆◆◆          | Y                     | 98.2 ± 9.4            | 12.7 ± 0.9                 | 32.8 ± 3.8                |
| 345-357 | ◆             | Y                     | 108.5 ± 5.0           | n/a                        | n/a                       |
| 294-370 | n.d.          | Y                     | n/a                   | n/a                        | n/a                       |
| 265-370 | n.d.          | Y                     | n/a                   | n/a                        | n/a                       |
| 289-372 | n.d.          | Y                     | n/a                   | n/a                        | n/a                       |
| 254-435 | n.d.          | N                     | n/a                   | n/a                        | n/a                       |
| 505-734 | ◆             | Y                     | n/a                   | n/a                        | n/a                       |
| 492-734 | ◆◆◆           | Y                     | 54.3 ± 2.3            | 60.0 ± 1.5                 | 1.9 ± 0.2                 |
| 439-597 | n.d.          | Y                     | n/a                   | n/a                        | n/a                       |
| 416-606 | n.d.          | Y                     | n/a                   | n/a                        | n/a                       |
| 438-633 | ◆◆◆◆          | Y                     | 1.1 ± 0.2             | 41 ± 2.5                   | 1.6 ± 0.1                 |
| 475-734 | ◆◆◆           | Y                     | 31.3 ± 4.4            | 59 ± 2.6                   | 1.9 ± 0.2                 |
| 408-654 | ◆             | Y                     | 1.7 ± 0.5             | n/a                        | n/a                       |
| 379-646 | ◆◆            | Y                     | 11.5 ± 9.9            | n/a                        | n/a                       |
| 385-699 | n.d.          | Y                     | n/a                   | n/a                        | n/a                       |
| 408-734 | n.d.          | Y                     | n/a                   | n/a                        | n/a                       |

**Table S3. Summary of virus characteristics.** For each virus analyzed, the finding from each method of characterization is listed, including: Q-PCR analysis of genome packaging (genomic titer), immunoblot detection of VP production (VP subunit expression), capsid protection of genomes from nucleases (% nuclease protection), capsid binding to heparin (% of Heparin-Bound Eluates) and cellular transduction (% Transduction Efficiency). In the case of the genomic titer, the black diamonds represent titers relative to the detection limit and the titers obtained with AAV2 and AAV4. Each diamond represents approximately 1-log in titer over background and n.d. means not detected above background, *i.e.*, within 1-log of the signal obtained with pBlueScript II plasmid lacking the AAV *cap* gene. n/a = not analyzed because titer was too low.
